# Supplementary material
Source: PubMed Central journal article supplement (PMC8511979)
Supplement: jama-e2114892-s002.pdf [file jama-e2114892-s002.pdf]

## Supplemental Online Content

Li FG, Maheux-Lacroix S, Deans R, et al. Effect of Fractional Carbon Dioxide Laser vs Sham Treatment on Symptom Severity in Women With Postmenopausal Vaginal Symptoms. *JAMA*. Published online October 12, 2021. doi:10.1001/jama.2021.14892

**Supplement 2.** eTable 1. Primary and secondary outcomes from baseline to 12 months

eFigure 1. Analyses for natural vs. iatrogenic menopause subgroups, from baseline to 12 months

eTable 2. Sexual activity and quality of sexual experience at baseline, 6 and 12 months

This supplemental material has been provided by the authors to give readers additional information about their work.

**eTable 1 - Primary and secondary outcomes from baseline to 12 months**

|                                      |                                          | Laser group    |                |                |                |                |                |                                       | Sham group     |                |                |                |                |                |                                       | Laser vs. Sham         |                |
|--------------------------------------|------------------------------------------|----------------|----------------|----------------|----------------|----------------|----------------|---------------------------------------|----------------|----------------|----------------|----------------|----------------|----------------|---------------------------------------|------------------------|----------------|
| Time (months)                        |                                          | 0<br>(n = 42)  | 1              | 2              | 3              | 6<br>(n = 42)  | 12<br>(n = 38) | Mean<br>difference<br>at 12<br>months | 0<br>(n = 41)  | 1              | 2              | 3              | 6<br>(n = 40)  | 12<br>(n = 40) | Mean<br>difference<br>at 12<br>months | Difference*            | p <sup>^</sup> |
| Visual<br>Analogue<br>Scale<br>(VAS) | Overall<br>vaginal<br>symptoms<br>(/100) | 51<br>(41, 60) | 54<br>(45, 62) | 43<br>(34, 52) | 35<br>(26, 44) | 35<br>(26, 44) | 33<br>(23, 43) | -17.2<br>(-44.4, 9.9)                 | 59<br>(51, 67) | 53<br>(44, 62) | 40<br>(31, 49) | 35<br>(27, 42) | 38<br>(29, 47) | 36<br>(26, 45) | -26.6<br>(-54.6, 1.4)                 | 9.4<br>(-28.7, 47.5)   | .66            |
|                                      | Most severe<br>symptom<br>(/100)         | 79<br>(73, 85) | 75<br>(67, 82) | 61<br>(51, 71) | 58<br>(49, 67) | 53<br>(42, 63) | 55<br>(44, 65) | -24.5<br>(-45.1, 3.8)                 | 77<br>(70, 84) | 70<br>(61, 79) | 65<br>(56, 75) | 54<br>(44, 64) | 56<br>(45, 67) | 59<br>(48, 70) | -20.4<br>(-41.1, 0.3)                 | -4.1<br>(-32.5, 24.3)  | .73            |
|                                      | Dyspareunia<br>(/100)                    | 69<br>(60, 78) | 69<br>(60, 79) | 59<br>(50, 69) | 59<br>(49, 68) | 50<br>(39, 61) | 54<br>(43, 65) | -28.8<br>(-67.7, 10.0)                | 70<br>(60, 80) | 70<br>(61, 79) | 65<br>(55, 75) | 52<br>(42, 62) | 56<br>(44, 67) | 67<br>(56, 78) | -4.0<br>(-35.3, 27.4)                 | -24.9<br>(-73.3, 23.6) | .75            |
|                                      | Vaginal<br>dryness (/100)                | 68<br>(59, 76) | 68<br>(60, 77) | 59<br>(50, 68) | 55<br>(46, 64) | 49<br>(39, 59) | 49<br>(40, 59) | -18.0<br>(-38.6, 2.5)                 | 71<br>(62, 79) | 71<br>(64, 79) | 64<br>(56, 71) | 52<br>(43, 61) | 52<br>(43, 62) | 59<br>(49, 69) | -12.0<br>(-38.3, 14.4)                | -6.1<br>(-38.5, 26.3)  | .54            |
|                                      | Vaginal<br>burning (/100)                | 35<br>(26, 44) | 28<br>(18, 38) | 15<br>(8, 23)  | 15<br>(9, 21)  | 19<br>(10, 27) | 9<br>(4, 13)   | -21.9<br>(-45.7, 1.9)                 | 31<br>(22, 41) | 33<br>(22, 43) | 27<br>(17, 36) | 14<br>(8, 19)  | 21<br>(12, 30) | 17<br>(9, 24)  | -16.0<br>(-45.6, 13.6)                | -5.9<br>(-42.7, 30.9)  | .46            |
|                                      | Vaginal<br>itching (/100)                | 21<br>(13, 29) | 23<br>(14, 32) | 13<br>(7, 19)  | 12<br>(7, 18)  | 13<br>(6, 19)  | 6<br>(2, 10)   | -15.4<br>(-34.6, 3.7)                 | 25<br>(17, 32) | 23<br>(15, 30) | 22<br>(14, 29) | 18<br>(12, 24) | 16<br>(9, 23)  | 14<br>(8, 19)  | -8.3<br>(-24.8, 8.3)                  | -7.2<br>(-31.7, 17.4)  | .16            |
|                                      | Dysuria (/100)                           | 15<br>(7, 23)  | 14<br>(6, 23)  | 9<br>(3, 16)   | 7<br>(2, 12)   | 9<br>(3, 14)   | 4<br>(0, 7)    | -11.4<br>(-26.6, 3.8)                 | 8<br>(3, 13)   | 14<br>(7, 21)  | 6<br>(4, 8)    | 7<br>(3, 11)   | 4<br>(2, 5)    | 8<br>(3, 12)   | 2.2<br>(-9.3, 13.7)                   | -13.6<br>(-32.2, 5.1)  | .34            |

Data presented as Mean (95% Confidence Interval). Visual analogue scale (VAS) from 0 to 100 for vaginal symptoms, with 0 being no symptoms and 100 being maximal symptom severity.

\*Difference in the mean difference from baseline to 12-months, between laser and sham groups

<sup>^</sup>p-value for comparison of sham and laser through time (baseline to 12-months).

|                                                   |                                           | Laser group       |                   |                   |                   |                   |                   |                                       | Sham group        |                   |                   |                   |                   |                   |                                       | Laser vs. Sham      |     |
|---------------------------------------------------|-------------------------------------------|-------------------|-------------------|-------------------|-------------------|-------------------|-------------------|---------------------------------------|-------------------|-------------------|-------------------|-------------------|-------------------|-------------------|---------------------------------------|---------------------|-----|
| Time (months)                                     |                                           | 0<br>(n = 42)     | 1                 | 2                 | 3                 | 6<br>(n = 42)     | 12<br>(n = 38)    | Mean<br>difference<br>at 12<br>months | 0<br>(n = 41)     | 1                 | 2                 | 3                 | 6<br>(n = 40)     | 12<br>(n = 40)    | Mean<br>difference<br>at 12<br>months | Difference*         | p^  |
| Vulvovaginal<br>Symptom<br>Questionnaire<br>(VSQ) | <b>Overall<br/>score (/20)</b>            | 7.6<br>(6.3, 8.9) | 7.3<br>(6.0, 8.7) | 5.8<br>(4.5, 7.2) | 5.7<br>(4.3, 7.1) | 4.9<br>(3.7, 6.1) | 4.3<br>(3.1, 5.6) | -3.1<br>(-6.3, 0.1)                   | 7.1<br>(5.7, 8.4) | 7.4<br>(6.0, 8.7) | 5.9<br>(4.7, 7.1) | 4.8<br>(3.8, 5.9) | 4.9<br>(3.4, 6.3) | 5.0<br>(3.5, 6.5) | -1.6<br>(-4.9, 1.6)                   | -1.5<br>(-5.9, 3.0) | .91 |
|                                                   | <b>Symptoms<br/>domain (/7)</b>           | 2.5<br>(1.9, 3.0) | 2.3<br>(1.8, 2.9) | 2.0<br>(1.4, 2.5) | 1.9<br>(1.3, 2.4) | 1.8<br>(1.3, 2.3) | 1.3<br>(0.8, 1.8) | -1.2<br>(-2.4, 0.1)                   | 2.5<br>(2.0, 3.0) | 2.8<br>(2.2, 3.4) | 2.2<br>(1.7, 2.7) | 1.8<br>(1.3, 2.3) | 1.8<br>(1.2, 2.4) | 1.9<br>(1.3, 2.5) | -0.5<br>(-1.5, 0.6)                   | -0.7<br>(-2.3, 0.9) | .49 |
|                                                   | <b>Emotions<br/>domain (/4)</b>           | 1.6<br>(1.2, 2.0) | 1.6<br>(1.2, 2.0) | 1.0<br>(0.6, 1.4) | 0.9<br>(0.5, 1.3) | 1.0<br>(0.6, 1.4) | 0.8<br>(0.4, 1.1) | -1.0<br>(-2.0, 0.1)                   | 1.4<br>(1.0, 1.8) | 1.4<br>(1.0, 1.8) | 1.0<br>(0.6, 1.4) | 0.9<br>(0.6, 1.1) | 0.8<br>(0.5, 1.2) | 0.9<br>(0.5, 1.3) | -0.5<br>(-1.4, 0.5)                   | -0.5<br>(-1.8, 0.9) | .71 |
|                                                   | <b>Life-impact<br/>domain (/4)</b>        | 1.1<br>(0.8, 1.5) | 1.2<br>(0.8, 1.6) | 1.0<br>(0.6, 1.3) | 1.1<br>(0.7, 1.5) | 0.7<br>(0.4, 1.0) | 0.6<br>(0.3, 0.9) | -0.8<br>(-1.6, 0.1)                   | 1.0<br>(0.6, 1.3) | 0.9<br>(0.6, 1.2) | 0.8<br>(0.4, 1.2) | 0.6<br>(0.4, 0.9) | 0.8<br>(0.4, 1.1) | 0.6<br>(0.2, 0.9) | -0.3<br>(-1.2, 0.6)                   | -0.5<br>(-1.7, 0.8) | .32 |
|                                                   | <b>Sexual-<br/>impact<br/>domain (/5)</b> | 2.3<br>(1.7, 2.8) | 2.1<br>(1.6, 2.7) | 1.9<br>(1.4, 2.4) | 1.9<br>(1.4, 2.4) | 1.5<br>(1.0, 2.0) | 1.7<br>(1.2, 2.2) | -0.2<br>(-1.6, 1.1)                   | 2.3<br>(1.7, 2.9) | 2.3<br>(1.8, 2.9) | 1.8<br>(1.3, 2.4) | 1.6<br>(1.2, 2.1) | 1.5<br>(1.0, 2.0) | 1.8<br>(1.3, 2.4) | -0.4<br>(-1.7, 0.9)                   | 0.2<br>(-1.6, 2.0)  | .93 |

Data presented as Mean (95% Confidence Interval). Vulvovaginal Symptom Questionnaire (VSQ) is a 21-item validated instrument to measure vulvovaginal symptoms in postmenopausal women. This assessed 4 domains (symptoms, emotions, life-impact and sexual-impact) with possible scores of 0-20, where 0 indicated no symptoms, and 20 indicated severe symptoms.

\*Difference in the mean difference from baseline to 12-months, between laser and sham groups

^p-value for comparison of sham and laser through time (baseline to 12-months).

| Time (months)                                    |                                       | Laser group         |   |   |   |                    |                   | Sham group                            |                    |   |   |   |                   | Laser vs. Sham     |                                       |                     |                |
|--------------------------------------------------|---------------------------------------|---------------------|---|---|---|--------------------|-------------------|---------------------------------------|--------------------|---|---|---|-------------------|--------------------|---------------------------------------|---------------------|----------------|
|                                                  |                                       | 0<br>(n = 42)       | 1 | 2 | 3 | 6<br>(n = 42)      | 12<br>(n = 38)    | Mean<br>difference<br>at 12<br>months | 0<br>(n = 41)      | 1 | 2 | 3 | 6<br>(n = 40)     | 12<br>(n = 40)     | Mean<br>difference<br>at 12<br>months | Difference*         | p <sup>^</sup> |
| Assessment<br>of Quality of<br>Life<br>(AQoL-6D) | Total<br>standardized<br>score (/100) | 75<br>(70, 80)      | - | - | - | 78<br>(74, 82)     | 81<br>(78, 84)    | 6.3<br>(-1.3, 13.8)                   | 79<br>(75, 82)     | - | - | - | 81<br>(79, 84)    | 78<br>(74, 83)     | 1.4<br>(-3.4, 6.2)                    | 4.8<br>(-3.9, 13.5) | .58            |
|                                                  | ADL domain (/15)                      | 4.3<br>(3.5, 5.0)   | - | - | - | 4.3<br>(3.5, 5.1)  | 3.8<br>(3.3, 4.2) | -0.6<br>(-1.6, 0.5)                   | 4.1<br>(3.6, 4.7)  | - | - | - | 4.1<br>(3.2, 4.9) | 4.1<br>(3.4, 4.8)  | -0.1<br>(-0.7, 0.6)                   | -0.5<br>(-1.7, 0.7) | .73            |
|                                                  | Relationships<br>domain (/20)         | 7.0<br>(6.2, 7.8)   | - | - | - | 6.1<br>(5.3, 7.0)  | 5.7<br>(5.1, 6.2) | -1.2<br>(-2.6, 0.1)                   | 6.2<br>(5.5, 6.8)  | - | - | - | 5.5<br>(4.8, 6.2) | 6.3<br>(5.6, 7.0)  | 0.1<br>(-0.9, 1.0)                    | -1.3<br>(-2.9, 0.3] | .40            |
|                                                  | Emotions domain<br>(/20)              | 10.2<br>(9.2, 11.2) | - | - | - | 9.2<br>(8.1, 10.3) | 8.8<br>(7.9, 9.6) | -1.4<br>(-3.3, 0.4)                   | 9.3<br>(8.4, 10.1) | - | - | - | 8.5<br>(7.6, 9.5) | 9.2<br>(8.3, 10.1) | -0.1<br>(-1.1, 1.0)                   | -1.4<br>(-3.4, 0.7) | .34            |
|                                                  | Coping domain<br>(/15)                | 7.1<br>(6.3, 7.9)   | - | - | - | 6.8<br>(6.1, 7.5)  | 6.4<br>(5.9, 6.9) | -0.8<br>(-2.1, 0.5)                   | 6.6<br>(5.9, 7.2)  | - | - | - | 6.2<br>(5.5, 6.9) | 6.7<br>(6.0, 7.4)  | 0.1<br>(-1.0, 1.2)                    | -0.9<br>(-2.6, 0.8) | .34            |
|                                                  | Pain domain (/15)                     | 5.8<br>(5.1, 6.6)   | - | - | - | 5.2<br>(4.4, 6.0)  | 5.0<br>(4.5, 5.5) | -0.8<br>(-1.9, 0.4)                   | 5.7<br>(5.0, 6.4)  | - | - | - | 5.2<br>(4.5, 5.9) | 5.3<br>(4.5, 6.0)  | -0.7<br>(-1.9, 0.4)                   | -0.0<br>(-1.6, 1.6) | .93            |
|                                                  | Communication<br>domain (/15)         | 5.3<br>(4.9, 5.8)   | - | - | - | 5.5<br>(5.1, 5.9)  | 5.5<br>(5.1, 5.8) | -0.1<br>(-1.0, 0.8)                   | 5.3<br>(4.9, 5.6)  | - | - | - | 5.1<br>(4.6, 5.6) | 5.3<br>(4.8, 5.8)  | -0.1<br>(-1.0, 0.8)                   | 0.0<br>(-1.2, 1.3)  | .39            |

Data presented as Mean (95% Confidence Interval). Assessment of Quality of Life 6D (AQoL-6D) is a self-reported instrument to assess health-related quality of life. Scoring is calculated using the 'standardized' scoring model (converted to score out of 100), where higher scores indicated better quality of life.

\*Difference in the mean difference from baseline to 12-months, between laser and sham groups

<sup>^</sup>p-value for comparison of sham and laser through time (baseline to 12-months).

|                                     |                                 | Laser group |                      |                      |                      |                      |                      | Sham group                            |   |                      |                      |                      |                      | Laser vs. Sham       |                                       |                     |                |
|-------------------------------------|---------------------------------|-------------|----------------------|----------------------|----------------------|----------------------|----------------------|---------------------------------------|---|----------------------|----------------------|----------------------|----------------------|----------------------|---------------------------------------|---------------------|----------------|
| Time (months)                       |                                 | 0           | 1<br>(n = 42)        | 2                    | 3                    | 6<br>(n = 42)        | 12<br>(n = 38)       | Mean<br>difference<br>at 12<br>months | 0 | 1<br>(n = 41)        | 2                    | 3                    | 6<br>(n = 40)        | 12<br>(n = 40)       | Mean<br>difference<br>at 12<br>months | Difference*         | p <sup>^</sup> |
| Vaginal<br>Health<br>Index<br>(VHI) | Overall<br>(/25)                | -           | 13.0<br>(11.9, 14.0) | 13.1<br>(12.1, 14.1) | 14.1<br>(13.1, 15.2) | 14.0<br>(13.0, 15.0) | 14.3<br>(12.9, 15.8) | 0.9<br>(-2.2, 4.0)                    | - | 13.7<br>(12.6, 14.9) | 14.3<br>(13.1, 15.5) | 14.2<br>(13.1, 15.2) | 14.3<br>(13.2, 15.3) | 14.7<br>(13.0, 16.4) | 1.3<br>(-1.4, 4.0)                    | -0.4<br>(-4.3, 3.6) | .38            |
|                                     | Elasticity<br>(/5)              | -           | 2.8<br>(2.6, 3.1)    | 2.7<br>(2.5, 2.9)    | 2.9<br>(2.7, 3.2)    | 3.0<br>(2.7, 3.3)    | 3.1<br>(2.7, 3.4)    | 0.2<br>(-0.6, 0.9)                    | - | 2.8<br>(2.5, 3.0)    | 2.9<br>(2.7, 3.2)    | 2.9<br>(2.6, 3.1)    | 2.9<br>(2.6, 3.2)    | 3.1<br>(2.8, 3.4)    | 0.4<br>(-0.2, 1.1)                    | -0.2<br>(-1.2, 0.8) | .95            |
|                                     | Fluid<br>volume (/5)            | -           | 2.7<br>(2.4, 3.1)    | 2.6<br>(2.3, 2.9)    | 2.9<br>(2.6, 3.2)    | 3.1<br>(2.8, 3.3)    | 3.0<br>(2.7, 3.4)    | 0.2<br>(-0.6, 1.0)                    | - | 2.7<br>(2.5, 3.0)    | 3.0<br>(2.7, 3.3)    | 2.9<br>(2.6, 3.2)    | 3.0<br>(2.7, 3.3)    | 3.1<br>(2.8, 3.5)    | 0.4<br>(-0.4, 1.2)                    | -0.2<br>(-1.3, 0.9) | .42            |
|                                     | pH (/5)                         | -           | 1.6<br>(1.2, 1.9)    | 1.5<br>(1.2, 1.9)    | 1.7<br>(1.3, 2.0)    | 1.5<br>(1.2, 1.8)    | 1.8<br>(1.4, 2.3)    | 0.1<br>(-0.7, 1.0)                    | - | 1.7<br>(1.4, 2.0)    | 1.7<br>(1.4, 2.1)    | 1.6<br>(1.3, 1.9)    | 1.6<br>(1.3, 1.8)    | 2.2<br>(1.7, 2.7)    | 0.6<br>(0.0, 1.3)                     | -0.5<br>(-1.5, 0.5) | .30            |
|                                     | Epithelial<br>integrity<br>(/5) | -           | 3.1<br>(2.8, 3.4)    | 3.3<br>(3.0, 3.7)    | 3.5<br>(3.2, 3.9)    | 3.5<br>(3.2, 3.7)    | 3.4<br>(2.9, 3.9)    | 0.1<br>(-0.8, 1.1)                    | - | 3.6<br>(3.3, 3.9)    | 3.5<br>(3.2, 3.8)    | 3.6<br>(3.4, 3.9)    | 3.7<br>(3.4, 4.0)    | 3.2<br>(2.7, 3.7)    | -0.4<br>(-1.2, 0.5)                   | 0.5<br>(-0.7, 1.7)  | .36            |
|                                     | Moisture<br>(/5)                | -           | 2.8<br>(2.5, 3.0)    | 2.9<br>(2.7, 3.1)    | 3.1<br>(2.9, 3.4)    | 3.0<br>(2.7, 3.3)    | 3.1<br>(2.7, 3.4)    | 0.2<br>(-0.6, 1.0)                    | - | 3.0<br>(2.7, 3.2)    | 3.2<br>(2.9, 3.4)    | 3.2<br>(2.9, 3.4)    | 3.1<br>(2.8, 3.4)    | 3.1<br>(2.7, 3.5)    | 0.2<br>(-0.5, 0.9)                    | 0.1<br>(-1.0, 1.1)  | .52            |

Data presented as Mean (95% Confidence Interval). Vaginal Health Index (VHI) was determined at each visit by blinded assessors who score the five parameters: vaginal elasticity; vaginal fluid amount; pH; epithelial integrity; and hydration/moisture. Score range is 5-25, where score <15 was considered vaginal atrophy.

\*Difference in the mean difference from baseline to 12-months, between laser and sham groups

<sup>^</sup>p-value for comparison of sham and laser through time (baseline to 12-months).

**eFigure 1 – Analyses for natural vs. iatrogenic menopause subgroups, from baseline to 12 months**

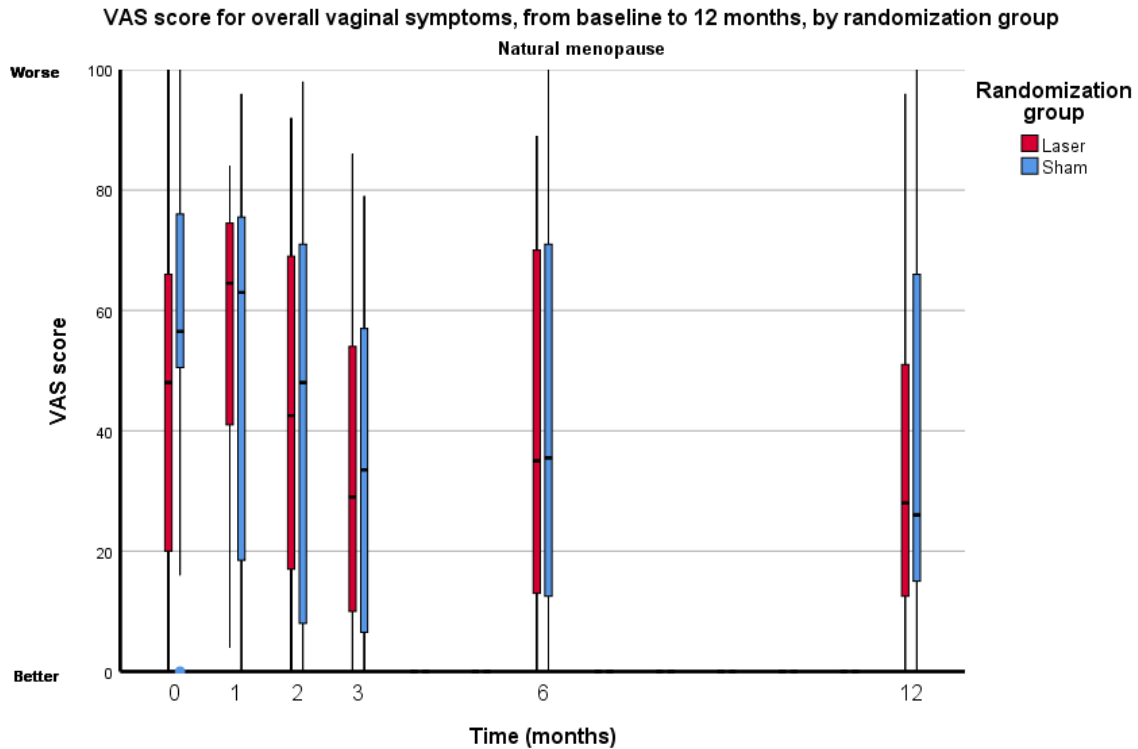

Laser vs. sham p=.85. Visual analogue scale (VAS) from 0 to 100, with 0 being no symptoms, and 100 being maximal symptom severity. In these boxplots, the median is represented by the line; the interquartile range is represented by the bar (75th centile by maximal edge; 25th centile by minimal edge); and the range is represented by the whiskers.

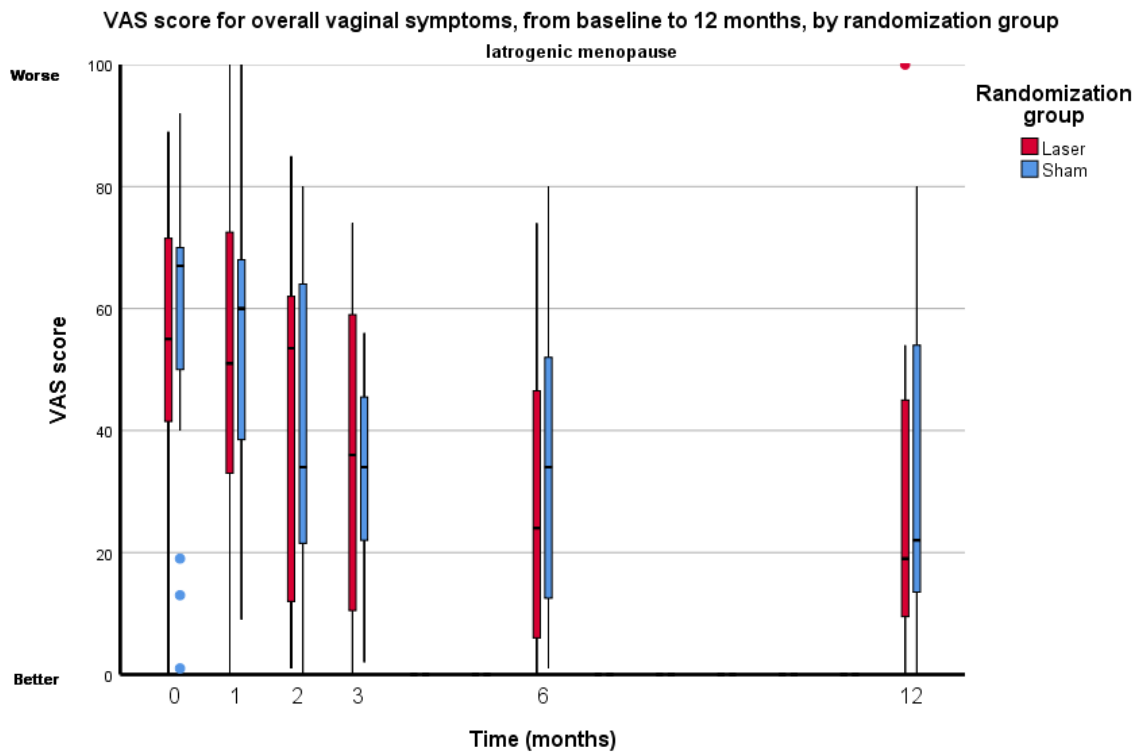

Laser vs. sham p=.62. Visual analogue scale (VAS) from 0 to 100, with 0 being no symptoms, and 100 being maximal symptom severity. In these boxplots, the median is represented by the line; the interquartile range is represented by the bar (75th centile by maximal edge; 25th centile by minimal edge); and the range is represented by the whiskers.

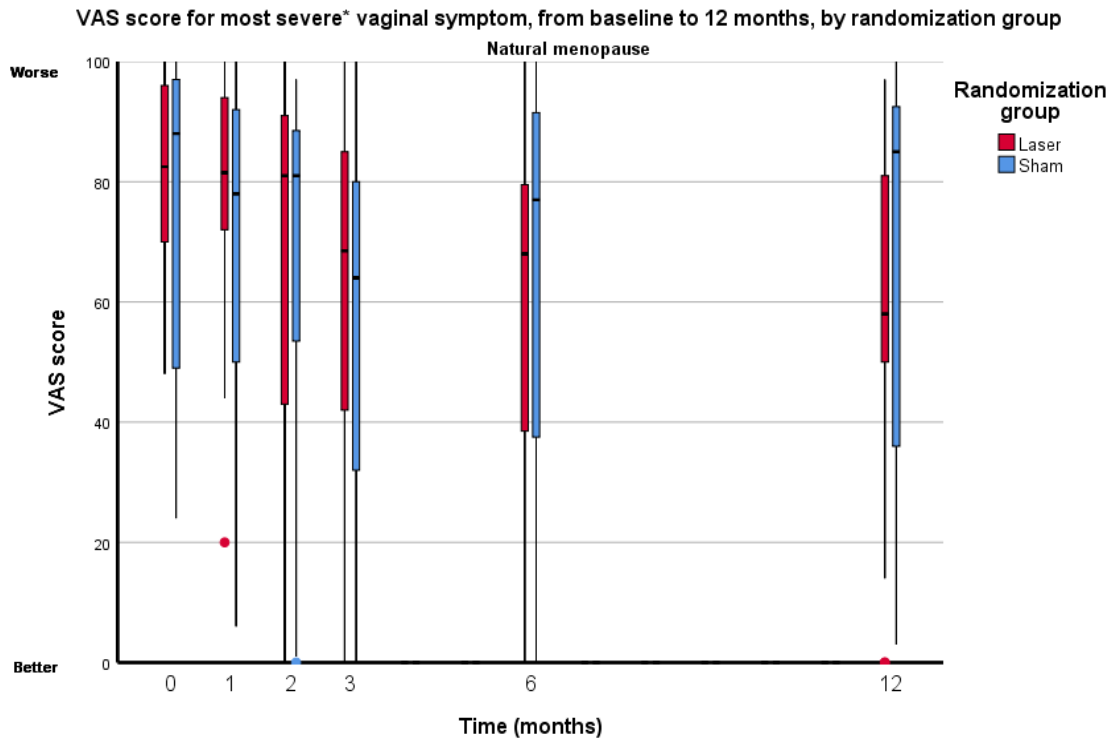

Laser vs. sham  $p=.60$ . \* The highest scoring vaginal symptom at baseline was taken to be the 'most severe' symptom for the participant throughout the trial. Visual analogue scale (VAS) from 0 to 100, with 0 being no symptoms, and 100 being maximal symptom severity. In these boxplots, the median is represented by the line; the interquartile range is represented by the bar (75th centile by maximal edge; 25th centile by minimal edge); and the range is represented by the whiskers.

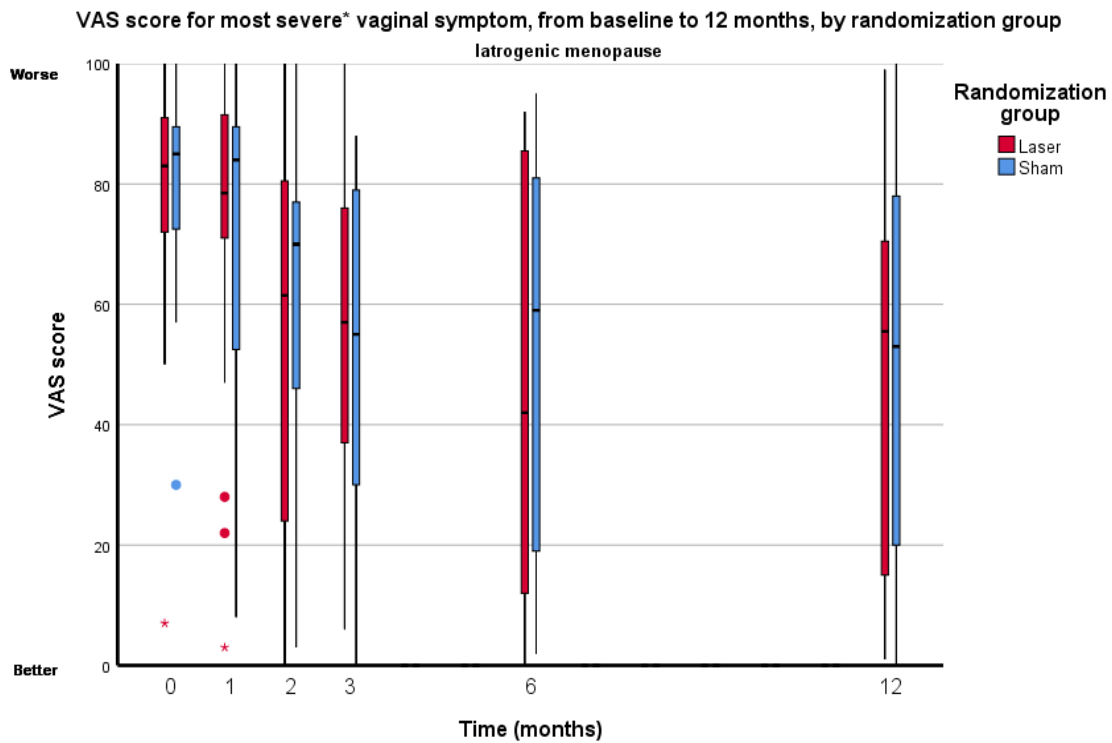

Laser vs. sham  $p=.95$ . \* The highest scoring vaginal symptom at baseline was taken to be the 'most severe' symptom for the participant throughout the trial. Visual analogue scale (VAS) from 0 to 100, with 0 being no symptoms, and 100 being maximal symptom severity. In these boxplots, the median is represented by the line; the interquartile range is represented by the bar (75th centile by maximal edge; 25th centile by minimal edge); and the range is represented by the whiskers.

**eTable 2 - Sexual activity and quality of sexual experience at baseline, 6 and 12 months**

|                                                        |                      | Laser group |             |             |                  |                              | Sham group  |             |             |                  |                              | Laser vs. Sham    |                |
|--------------------------------------------------------|----------------------|-------------|-------------|-------------|------------------|------------------------------|-------------|-------------|-------------|------------------|------------------------------|-------------------|----------------|
| Time (months)                                          |                      | 0           | 6           | 12          | p                | Mean difference at 12 months | 0           | 6           | 12          | p                | Mean difference at 12 months | Difference*       | p <sup>^</sup> |
| <b>Sexually active</b>                                 | <b>n (%)</b>         | 22 (52)     | 23 (56)     | 19 (51)     | .29 <sup>#</sup> | -                            | 20 (49)     | 20 (50)     | 23 (58)     | .55 <sup>#</sup> | -                            |                   | -              |
| <b>Female Sexual Satisfaction Questionnaire (FSSQ)</b> | <b>Mean [95% CI]</b> | 23 [19, 28] | 23 [18, 28] | 24 [18, 30] | -                | 4.7 [-10.6, 20.0]            | 20 [15, 26] | 24 [19, 30] | 21 [17, 25] | -                | 1.9 [-11.5, 15.4]            | 2.8 [-17.0, 22.5] | .67            |

<sup>#</sup>Chi-square analysis; p-value for trend within allocated (laser or sham) group through time (baseline to 12-months).

\*Difference in the mean difference from baseline to 12-months, between laser and sham groups

<sup>^</sup>p-value for comparison of sham and laser through time (baseline to 12-months).

Monash Women's Health Program Female Sexuality Satisfaction Questionnaire (FSSQ) is a self-reported instrument to evaluate the nature and quality of the female sexual experience for a sexual event. Score range 5-54, where higher scores indicated better quality of sexual experience.
