# Supplementary material
Source: PubMed Central journal article supplement (PMC8511979)
Supplement: jama-e2114892-s003.pdf [file jama-e2114892-s003.pdf]

## Data Sharing Statement

### Data

**Data available:** Yes

**Data types:** Deidentified participant data

**How to access data:** All data collected in this study will be de-identified is openly accessible online (<https://doi.org/10.26190/fwrf-de73>). Related documents including the study protocol, statistical analysis plan and informed consent form are available by contacting the corresponding author. URL:

<https://researchdata.edu.au/randomized-trial-co2-vaginal-symptoms/1609179>

**When available:** beginning date: 12-15-2020

### Supporting Documents

**Document types:** None

### Additional Information

**Who can access the data:** Public

**Types of analyses:** Open licence - Creative Commons Attribution 4.0 International (CC BY 4.0)

**Mechanisms of data availability:** Publicly available at <https://researchdata.edu.au/randomized-trial-co2-vaginal-symptoms/1609179>
